# Supplementary material for: Effects of Donor Cell Types on the Development of Bovine Embryos Using Cytoplasm Injection Cloning Technology
Source: MDPI journal article supplement (doi:10.3390/ijms22115841), 2021-05-29
Supplement: s1 [file s1]

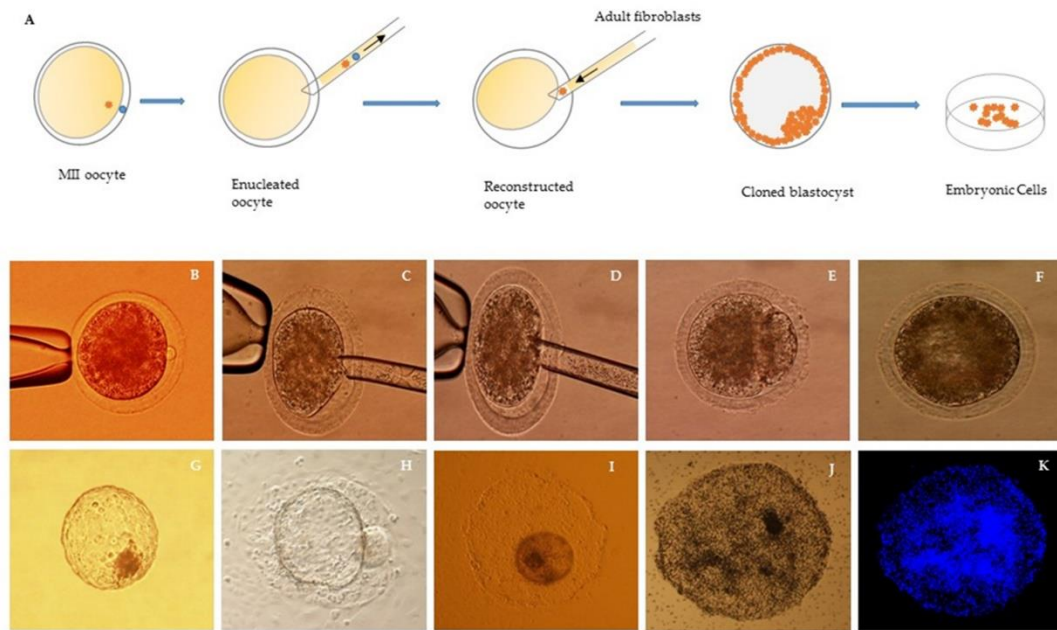

**Supplementary Figure 1.** Derivation and morphology of bovine embryonic cells (ECs). (A) Strategy for derivation of ECs. By injecting the nuclei of adult fibroblasts (AFs) into enucleated oocytes, reconstructed oocytes were obtained. When the cloned embryos developed to the stage of hatching or hatched blastocysts, the zona pellucida (ZP) was removed and 2-3 blastocysts per culture insert were placed in the 8-well IbiTreat  $\mu$ -plates. Outgrowths from the attached blastocysts were seen and left to expand until day 5–7. ECs were morphologically large cuboidal cells. (B) Intact oocytes. The MII is pointed by an arrow. (C) Enucleated oocyte. (D–E) The procedure of injecting the nuclei of AFs and cytoplasm into enucleated oocytes. (F) Fused embryos. (G) Hatched embryo. (H–I) Proliferating outgrowths from one hatched blastocyst on the plates. (J) AFs-derived ECs. (K) DAPI staining in the amplified ECs.

**Supplementary table 1.** Primer sequences for RT-qPCR.

| <b>Genes</b>     | <b>Primer sequence</b>                                             | <b>Accession no.</b> | <b>Product size (bp)</b> |
|------------------|--------------------------------------------------------------------|----------------------|--------------------------|
| <i>NANOG</i>     | F: CGTGTCTTGCAAACGTCAT<br>R: CTGTCTCTCCTCTTCCCTCCTC                | DQ069776             | 66                       |
| <i>OCT4</i>      | F: CAACAACGAGAATCTGCAGG<br>R: ATGTGGCTAATTTGCTGCAG                 | AY490804.1           | 153                      |
| <i>SOX2</i>      | F: GGTTGACATCGTTGGTAATTTATAATAGC<br>R: CACAGTAATTTTCATGTTGGTTTTTCA | NM_001105463         | 88                       |
| <i>CDX2</i>      | F: GCAAAGGAAAGGAAAATCAACAA<br>R: GGGCTCTGGGACGCTTCT                | XM_871005            | 120                      |
| <i>p53</i>       | F: CCTCCCAGAAGACCTACCCCT<br>R: CTCCGTCATGTGCTCCAACCT               | X81704.1             | 221                      |
| <i>Bax</i>       | F: GGCTGGACATTGGACTTCCTTC<br>R: TGGTCACTGTCTGCCATGTGG              | NM_173894.1          | 112                      |
| <i>Caspase 3</i> | F: TACTTTTCCTGGCGAAATGC<br>R: TTGCATGAAAAGCAGAATCG                 | NM_001077840         | 169                      |
| <i>BCL2</i>      | F: TGGATGACCGAGTACCTGAA<br>R: CAGCCAGGAGAAATCAAACA                 | NM_001166486.1       | 120                      |
| <i>DNMT1</i>     | F: AGGGAGACGTGGAGATGCTG<br>R: CATGGAGCGCTTGAAGGAG                  | AY244709             | 194                      |
| <i>DNMT3a</i>    | F: AGACATGTGGGTGAACCCG<br>R: GGCTCCCACAAGAGATGCAG                  | AY271298             | 188                      |
| <i>DNMT3b</i>    | F: CAGGATGGGAAGGAGTTTGGA<br>R: CACCAAACCACTGGACCCAC                | AY244710             | 151                      |
| <i>HDAC1</i>     | F: ACCTTTATCCCACAACCCTTCA<br>R: TCCCTTTTACCCAGTACCCATT             | NM001037444          | 201                      |
| <i>HDAC3</i>     | F: AAGTTTGAGGCTTCTGGTTT<br>R: GACTCGGTCAGTGAGGTAGA                 | NM0012062431         | 150                      |
| <i>GAPDH</i>     | F: CCCAGAATATCATCCCTGCT<br>R: CTGCTTCACCACCTTCTTGA                 | NM_001034034         | 185                      |

**Supplementary Table 2.** Characterization of day 8 bovine blastocysts of three groups.

| <b>Groups</b> | <b>No. of blastocysts</b> | <b>No. of total cells</b> | <b>No. of TE cells</b> | <b>No. of ICM cells</b> | <b>ICM:TCN cell ratio</b> |
|---------------|---------------------------|---------------------------|------------------------|-------------------------|---------------------------|
| IVF           | 10                        | 191.7 ± 3.9               | 144.4 ± 4.4            | 49.2 ± 1.8a             | 34.8 ± 1.6a               |
| AF-CICT       | 10                        | 177.3 ± 0.9               | 141.2 ± 3.9            | 30.8 ± 0.9c             | 21.0 ± 0.7c               |
| EC-CICT       | 10                        | 187.9 ± 4.9               | 145.4 ± 5.2            | 42.5 ± 1.2b             | 29.7 ± 1.6b               |

<sup>a-c</sup> Values with different superscripts denotes significantly different within same column ( $p < 0.05$ ).  
Data are mean ± SEM of at least five independent replicates.

**Supplementary Table 3.** Apoptotic analysis of day 8 bovine blastocysts of three groups.

| Groups  | No. of blastocysts | No. of total cells | No. of apoptotic cells | Apoptotic cells rate   |
|---------|--------------------|--------------------|------------------------|------------------------|
| IVF     | 10                 | 194.0 ± 9.9        | 5.4 ± 0.5 <sup>a</sup> | 2.9 ± 0.3 <sup>a</sup> |
| AF-CICT | 10                 | 172.1 ± 7.5        | 4.7 ± 0.4 <sup>a</sup> | 2.8 ± 0.4 <sup>a</sup> |
| EC-CICT | 10                 | 190.5 ± 5.2        | 3.1 ± 0.3 <sup>b</sup> | 1.6 ± 0.2 <sup>b</sup> |

<sup>a-c</sup> Values with different superscripts denotes significantly different within same column ( $p < 0.05$ ). Data are mean ± SEM of at least five independent replicates.

**Supplementary Table 4.** Primary antibodies used for immunofluorescence.

| <b>Primary Antibody</b> | <b>REF no.</b> | <b>Company</b>           |
|-------------------------|----------------|--------------------------|
| CDX-2                   | Am-392         | Biogenex                 |
| H3K56ac                 | ab71956        | Abcam                    |
| H3K9me2                 | ab1220         | Abcam                    |
| NF- $\kappa$ B          | sc-271908      | Santa Cruz Biotechnology |
| CDK-2                   | NU-906         | Biogenex                 |
| CDK-4                   | PA5-27827      | Invitrogen               |
| DAPI                    | 62248          | Thermo Fisher scientific |
| FITC                    | F-2765         | Invitrogen               |
| TRITC                   | A16071         | Invitrogen               |
